# Supplementary material for: Automated Prediction of Neoadjuvant Chemoradiotherapy Response in Locally Advanced Cervical Cancer Using Hybrid Model-Based MRI Radiomics
Source: MDPI journal article supplement (doi:10.3390/diagnostics14010005), 2023-12-19
Supplement: s1 [file s1]

109-dimension domain specific features were extracted. The features were divided into four types, including shape, size, voxel intensity, texture. The detail of this domain specific feature is shown in following table.

| Type            | Number | Feature                                            |
|-----------------|--------|----------------------------------------------------|
| shape           | 1      | original_shape_Flatness                            |
|                 | 2      | original_shape_Maximum2DDiameterRow                |
|                 | 3      | original_shape_MajorAxisLength                     |
|                 | 4      | original_shape_Maximum2DDiameterColumn             |
| size            | 5      | original_glszm_LargeAreaEmphasis                   |
|                 | 6      | original_glszm_SizeZoneNonUniformity               |
|                 | 7      | original_glszm_SmallAreaEmphasis                   |
|                 | 8      | original_glszm_LargeAreaHighGrayLevelEmphasis      |
|                 | 9      | original_glszm_ZonePercentage                      |
|                 | 10     | original_glszm_SmallAreaLowGrayLevelEmphasis       |
| voxel intensity | 11     | square_firstorder_Variance                         |
|                 | 12     | exponential_firstorder_Kurtosis                    |
|                 | 13     | wavelet-HHH_firstorder_Uniformity                  |
|                 | 14     | wavelet-LHH_firstorder_90Percentile                |
|                 | 15     | wavelet-HLL_glszm_GrayLevelVariance                |
|                 | 16     | wavelet-HHH_firstorder_Energy                      |
|                 | 17     | wavelet-HLH_firstorder_RobustMeanAbsoluteDeviation |
|                 | 18     | wavelet-LHH_firstorder_MeanAbsoluteDeviation       |
|                 | 19     | wavelet-HLH_firstorder_Minimum                     |
|                 | 20     | wavelet-HHH_firstorder_TotalEnergy                 |
|                 | 21     | wavelet-HLL_firstorder_90Percentile                |
|                 | 22     | wavelet-LHL_firstorder_TotalEnergy                 |
|                 | 23     | wavelet-HHH_firstorder_Variance                    |
|                 | 24     | wavelet-HLH_firstorder_InterquartileRange          |
|                 | 25     | wavelet-LHH_firstorder_Variance                    |
|                 | 26     | exponential_firstorder_MeanAbsoluteDeviation       |
|                 | 27     | wavelet-HHH_firstorder_Skewness                    |
|                 | 28     | wavelet-LHL_firstorder_Energy                      |
|                 | 29     | wavelet-HLH_firstorder_Energy                      |
|                 | 30     | squareroot_firstorder_Variance                     |
|                 | 31     | lbp-3D-k_firstorder_Minimum                        |
|                 | 32     | lbp-3D-k_firstorder_90Percentile                   |
|                 | 33     | lbp-3D-k_firstorder_Mean                           |
|                 | 34     | wavelet-LLH_firstorder_Skewness                    |
|                 | 35     | wavelet-LLL_firstorder_Skewness                    |

|         |    |                                                    |
|---------|----|----------------------------------------------------|
| texture | 36 | wavelet-HHL_firstorder_Variance                    |
|         | 37 | wavelet-HHL_firstorder_Skewness                    |
|         | 38 | wavelet-HLL_firstorder_90Percentile                |
|         | 39 | lbp-3D-m2_firstorder_MeanAbsoluteDeviation         |
|         | 40 | lbp-3D-m1_firstorder_90Percentile                  |
|         | 41 | original_glcem_JointEntropy                        |
|         | 42 | wavelet-LLH_glcem_Correlation                      |
|         | 43 | original_ngtdm_Strength                            |
|         | 44 | wavelet-LLH_glszm_SmallAreaLowGrayLevelEmphasis    |
|         | 45 | wavelet-HLH_glszm_SizeZoneNonUniformity            |
|         | 46 | wavelet-HHH_glcem_Imc1                             |
|         | 47 | original_gldm_DependenceEntropy                    |
|         | 48 | wavelet-LLH_glcem_ClusterTendency                  |
|         | 49 | wavelet-LHL_glszm_GrayLevelNonUniformityNormalized |
|         | 50 | wavelet-LLL_glszm_HighGrayLevelZoneEmphasis        |
|         | 51 | wavelet-LLL_ngtdm_Strength                         |
|         | 52 | wavelet-HHH_glcem_SumSquares                       |
|         | 53 | wavelet-HLL_glrIm_RunPercentage                    |
|         | 54 | wavelet-LLH_glcem_Idmn                             |
|         | 55 | wavelet-HLL_glszm_GrayLevelNonUniformityNormalized |
|         | 56 | wavelet-LHL_glrIm_GrayLevelVariance                |
|         | 57 | wavelet-LLH_glcem_DifferenceEntropy                |
|         | 58 | wavelet-LLH_glcem_MCC                              |
|         | 59 | wavelet-HHH_glcem_JointEntropy                     |
|         | 60 | wavelet-LLL_firstorder_Skewness                    |
|         | 61 | wavelet-LLH_glrIm_ShortRunLowGrayLevelEmphasis     |
|         | 62 | wavelet-HLH_glrIm_LongRunEmphasis                  |
|         | 63 | wavelet-LHL_gldm_GrayLevelVariance                 |
|         | 64 | wavelet-HHL_glszm_GrayLevelNonUniformityNormalized |
|         | 65 | wavelet-LLL_glszm_ZoneVariance                     |
|         | 66 | lbp-3D-k_glszm_SizeZoneNonUniformityNormalized     |
|         | 67 | wavelet-LHH_glcem_JointEntropy                     |
|         | 68 | original_glcem_Imc2                                |
|         | 69 | lbp-3D-k_glcem_ClusterProminence                   |

|    |                                                        |
|----|--------------------------------------------------------|
| 70 | original_glcml_SumEntropy                              |
| 71 | wavelet-LLH_glcml_Id                                   |
| 72 | wavelet-HLH_glrml_LowGrayLevelRunEmphasis              |
| 73 | wavelet-<br>HLH_glszm_GrayLevelNonUniformityNormalized |
| 74 | wavelet-LLH_glcml_Contrast                             |
| 75 | wavelet-LHL_glszm_LowGrayLevelZoneEmphasis             |
| 76 | wavelet-<br>LLH_glrml_ShortRunHighGrayLevelEmphasis    |
| 77 | wavelet-HLH_firstorder_Minimum                         |
| 78 | wavelet-<br>HHH_glrml_GrayLevelNonUniformityNormalized |
| 79 | wavelet-HLL_firstorder_TotalEnergy                     |
| 80 | wavelet-LHL_firstorder_Entropy                         |
| 81 | wavelet-LLH_firstorder_Variance                        |
| 82 | wavelet-LHH_firstorder_InterquartileRange              |
| 83 | wavelet-HLH_glrml_LowGrayLevelRunEmphasis              |
| 84 | wavelet-LHH_glrml_LongRunEmphasis                      |
| 85 | wavelet-HLL_glrml_RunPercentage                        |
| 86 | wavelet-LLL_glszm_HighGrayLevelZoneEmphasis            |
| 87 | wavelet-<br>LHL_glrml_ShortRunHighGrayLevelEmphasis    |
| 88 | wavelet-HHH_gldm_DependenceVariance                    |
| 89 | wavelet-<br>LHL_glszm_HighGrayLevelZoneEmphasis        |
| 90 | wavelet-HHH_glrml_GrayLevelVariance                    |
| 91 | wavelet-HLH_glcml_ClusterShade                         |
| 92 | wavelet-<br>HLL_glszm_GrayLevelNonUniformityNormalized |
| 93 | wavelet-LHL_glrml_GrayLevelVariance                    |
| 94 | wavelet-LLH_glcml_DifferenceEntropy                    |
| 95 | wavelet-LLH_glcml_MCC                                  |
| 96 | wavelet-HHH_glcml_JointEntropy                         |
| 97 | wavelet-LLH_glrml_RunLengthNonUniformity               |
| 98 | wavelet-<br>HHL_glszm_GrayLevelNonUniformityNormalized |

|     |                                                        |
|-----|--------------------------------------------------------|
| 99  | lbp-3D-<br>k_glszm_SizeZoneNonUniformityNormalized     |
| 100 | wavelet-LHH_glcmm_JointEntropy                         |
| 101 | original_glcmm_Imc2                                    |
| 102 | lbp-3D-k_glcmm_ClusterProminence                       |
| 103 | original_glcmm_SumEntropy                              |
| 104 | wavelet-LLH_glcmm_Idn                                  |
| 105 | wavelet-HLH_glrmm_LowGrayLevelRunEmphasis              |
| 106 | wavelet-<br>HLH_glszm_GrayLevelNonUniformityNormalized |
| 107 | wavelet-LLH_glcmm_Contrast                             |
| 108 | wavelet-LHL_glszm_LowGrayLevelZoneEmphasis             |
| 109 | wavelet-<br>LLH_glrmm_ShortRunHighGrayLevelEmphasis    |
